# Supplementary material for: A highly sensitive and selective resonance Rayleigh scattering method for bisphenol A detection based on the aptamer–nanogold catalysis of the HAuCl4–vitamin C particle reaction
Source: Royal Society of Chemistry journal article supplement (doi:10.1039/c3ra41845f), 2013-01-01
Supplement: c3ra41845f.pdf [file c3ra41845f.pdf]

# A highly sensitive and selective resonance Rayleigh scattering method for bisphenol A based on the aptamer-nanogold catalysis of H<sub>2</sub>AuCl<sub>4</sub>-vitamine C particle reaction

Dongmei Yao, Guiqing Wen\*, Aihui Liang, Zhiliang Jiang\*

(Key Laboratory of Ecology of Rare and Endangered Species and Environmental Protection, Ministry of Education, Guangxi Normal University, Guilin 541004, China)

## Absorption spectra

There is only one surface plasmon resonance (SPR) absorption peak at 518 nm for the GNs. Figure 1S indicated that Apt-GN was aggregated nonspecifically in the condition of pH 7.6 Na<sub>2</sub>HPO<sub>4</sub>-NaH<sub>2</sub>PO<sub>4</sub> buffer solution, which showed a weak SPR peak at 518 nm. Upon addition of BPA, Apt-GN specifically combined with BPA to form dispersed BPA-Apt-GN conjugates, the SPR absorption peak increased at 518 nm.

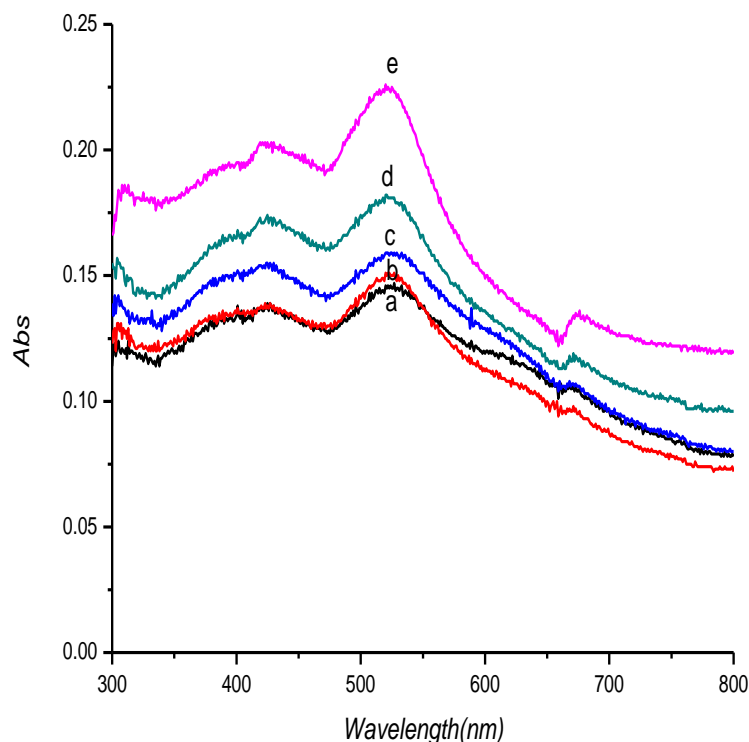

Figure 1S Absorption spectra of the BPA-Apt-GN system

a:  $2.7 \times 10^{-5}$  mol/L Apt-GN-pH7.6 PBS; b: a-66.7 ng/mL BPA; c: a-133.3 ng/mL BPA; d: a-333.3 ng/mL BPA; e: a-666.7 ng/mL BPA

## Scanning electron microscope

The reaction solution of BPA-Apt-GN system was obtained by the procedure, and centrifugation and ultrasonic

dispersion of the reaction solution were made twice to prepare sample solution. Then, a 5.0  $\mu\text{L}$  of the sample solution was added to a clean silicon wafer, natural drying, the sample was placed in a scanning electron microscope, to obtain the scanning electron micrograph (Figure 2S). Figure 2Sa showed that Apt-GN particles dispersed in solution. In the absent of BPA, the Apt-GNs were aggregated and formed big aggregation in the pH 7.6  $\text{Na}_2\text{HPO}_4\text{-NaH}_2\text{PO}_4$  buffer solution (Figure 2Sb). When the concentration of BPA increased, Apt-GN reacted specifically with BPA to form BPA-Apt-GN conjugates that were dispersed in PBS buffer solution stably (Figure 2Sc), which led to the aggregates reduced, that is agreement with the RRS results.

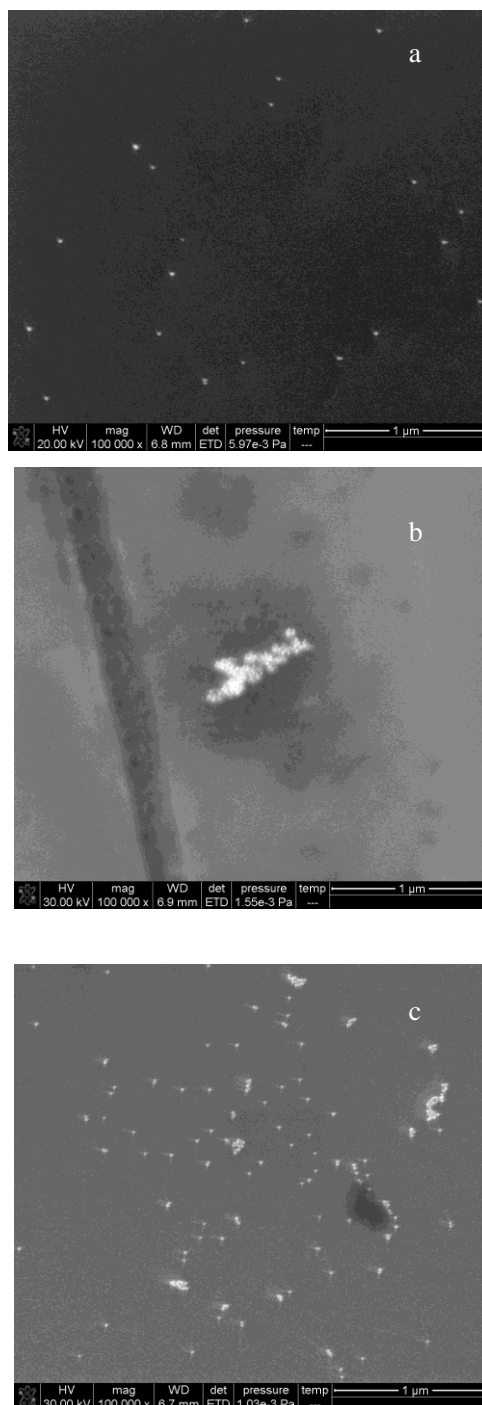

Figure 2S Scanning electron microscope images

a:  $2.7 \times 10^{-5}$  mol/L Apt-GN; b: 5.17  $\mu\text{g/mL}$  Apt-GN-pH7.6 PBS; c: a-1  $\mu\text{g/mL}$  BPA.

## Preparation conditions of the Apt-GN probe

### Effect of NaCl concentration

The effect of NaCl concentration on the GN labeled-aptamer was examined. A 200  $\mu\text{L}$  of 47.3  $\mu\text{g/mL}$  GN was added into each 5mL marked tube, a certain amount of 2.0 mol/L NaCl was added, after 10min, the solution was diluted to 2.0mL. The RRS intensity at 380 nm ( $I_{380\text{nm}}$ ) was recorded. Table 1S showed that when the NaCl concentration was more than 0.013 mol/L, the  $I_{380\text{nm}}$  increased slightly. Thus, a 0.013 mol/L NaCl concentration was chosen for use.

Table 1S Effect of NaCl concentration on the  $I_{380\text{nm}}$

| NaCl( $\mu\text{L}$ ) | 0   | 5   | 10  | 15  | 20  | 30  | 40  |
|-----------------------|-----|-----|-----|-----|-----|-----|-----|
| $I_{380\text{nm}}$    | 188 | 617 | 929 | 808 | 911 | 834 | 812 |

### Selection of labeling pH

The effect of pH on the GN labeled aptamer was examined. A 200  $\mu\text{L}$  of 47.3  $\mu\text{g/mL}$  GN was added into each 5mL marked tube and the pH adjusted to 3.0-9.0 using 0.1mol/L HCl and 0.1mol/L  $\text{K}_2\text{CO}_3$ , and 100  $\mu\text{L}$  of 0.5 $\mu\text{mol/L}$  aptamer was added, after 10min, 10 $\mu\text{L}$  of 2.0 mol/L NaCl was added. After 30min, the solution was diluted to 1.5mL. The RRS intensity at 520 nm ( $I_{380\text{nm}}$ ) was recorded. Table 2S showed that when the pH was more than 5.0, the  $I_{380\text{nm}}$  decreased slightly, owing to GN being coated by aptamer. Thus the GN could not aggregate in NaCl solution. A pH 6.5 was chosen for use.

Table 2S Effect of pH on the  $I_{380\text{nm}}$

| pH                 | 3.0 | 3.5 | 4.0 | 4.5 | 5.0 | 6.0 | 6.5 | 7.5 | 8.0 | 9.0 |
|--------------------|-----|-----|-----|-----|-----|-----|-----|-----|-----|-----|
| $I_{380\text{nm}}$ | 544 | 344 | 282 | 316 | 246 | 279 | 240 | 244 | 231 | 271 |

### Selection of aptamer amount

A 200  $\mu\text{L}$  of  $2.4 \times 10^{-4}$  mol/L GN was added into each 5mL marked tube and the pH adjusted to 6.5. Then, different amounts of 0.5 $\mu\text{mol/L}$  aptamer were added, then ultrasound 10min, 10 $\mu\text{L}$  of 2.0 mol/L NaCl was added. After 30min, the solution was diluted to 1.5mL. The RRS intensity at 520 nm ( $I_{380\text{nm}}$ ) was recorded. Table 3S showed that when aptamer amount was more than 100 $\mu\text{L}$ , the  $I_{520\text{nm}}$  decreased slightly. Thus, 100 $\mu\text{L}$  of aptamer was chosen for use.

Table 3S Effect of aptamer amount on the  $I_{380\text{nm}}$

| Apt( $\mu\text{L}$ ) | 0   | 20  | 50  | 80  | 100 | 130 | 160 | 290 | 250 | 300 |
|----------------------|-----|-----|-----|-----|-----|-----|-----|-----|-----|-----|
| $I_{380\text{nm}}$   | 910 | 438 | 254 | 370 | 253 | 234 | 215 | 263 | 214 | 279 |

Table 4S The effect of ultrasonic and standing form on the  $I_{380\text{nm}}$

| Reaction form | $I_{380\text{nm}}$                                   | RSD(%) |
|---------------|------------------------------------------------------|--------|
| Standing      | 1362, 1240, 1327, 1275, 1119, 1391, 1579, 1677, 1705 | 14.4   |
| Ultrasonic    | 1238, 1250, 1256, 1237, 1252, 1375, 1368, 1238, 1330 | 4.5    |
